# Supplementary material for: Effects of resonant bonding and structural distortion on the phase change properties of Sn2Sb2Se5
Source: Royal Society of Chemistry journal article supplement (doi:10.1039/c7tc01135k), 2017-01-01
Supplement: c7tc01135k1.pdf [file c7tc01135k1.pdf]

Effects of resonant bonding and structural distortion on phase change properties of  
 $\text{Sn}_2\text{Sb}_2\text{Se}_5$

Min Ahn<sup>a</sup>, Kwang-sik Jeong<sup>a</sup>, Seungjong Park<sup>a</sup>, Sungjin Park<sup>a</sup>, Hoon Jung<sup>a</sup>, Jeonghwa Han<sup>a</sup>, Wonjun  
Yang<sup>a</sup>, Dasol Kim<sup>a</sup>, Hongsik Jeong<sup>b</sup>, and Mann-Ho Cho<sup>\*a</sup>

<sup>a</sup>*Institute of Physics and Applied Physics, Yonsei University, Seoul 120-749, Republic of Korea*

<sup>b</sup>*School of Integrated Technology, Yonsei University, Incheon 406-849, Republic of Korea*

---

\*To whom correspondence should be addressed. e-mail : mh.cho@yonsei.ac.kr

### S1. Homogeneity of crystalline SSS film.

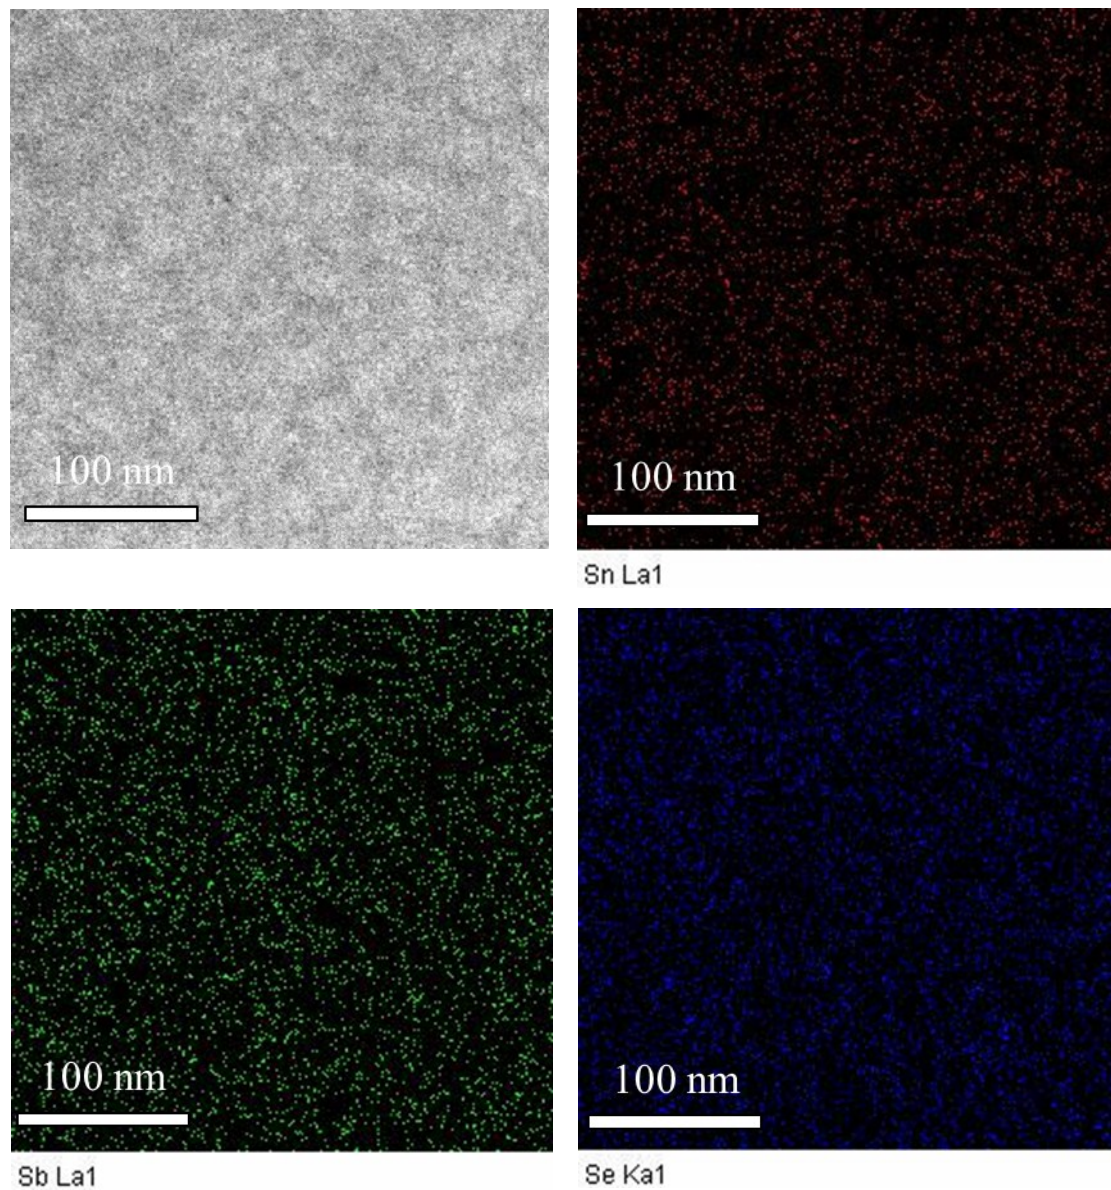

Figure S1. HRTEM image and EDS results of crystalline SSS film. The red, green, and blue dots represent individual atoms.

## S2. Bond length distributions of Sn-Se bond and Sb-Se bond in crystalline SSS

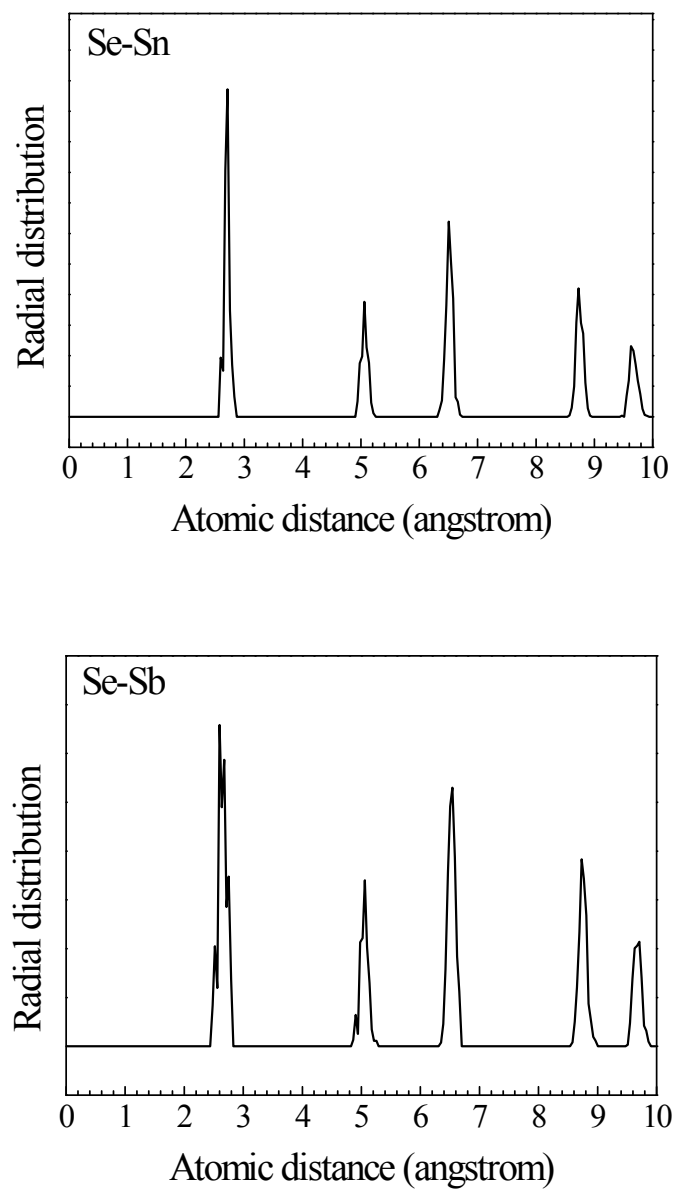

Figure S2. Calculation results showing radial distributions of Sn atoms and Sb atoms around Se atoms in crystalline SSS.

### S3. Phonon dispersion and Raman mode analysis results for crystalline SSS

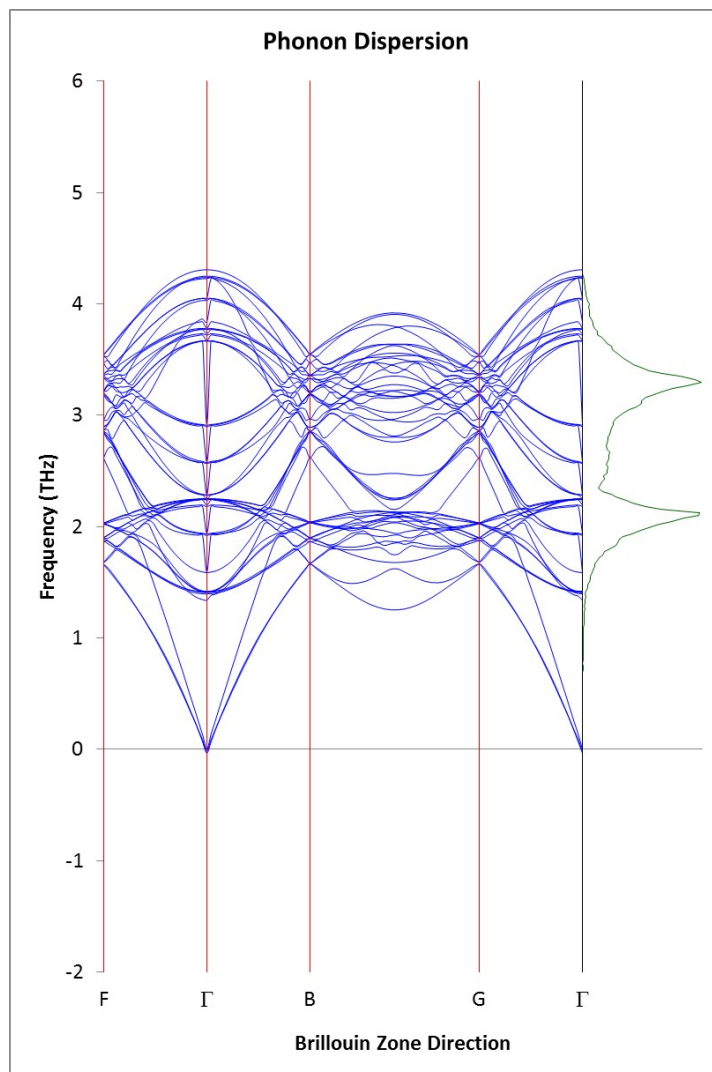

Figure S3. Calculation results for phonon dispersion of crystalline SSS in case of six-fold Sn atom.

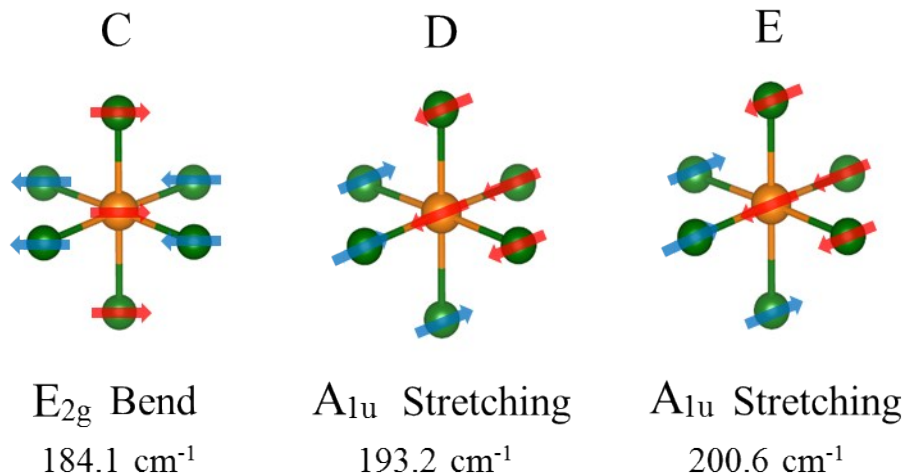

Figure S4. Schematic diagram of Raman vibrational mode in SSS simulated from calculation result in Figure S3. C, D, and E correspond to each peak of the Raman spectrum in Figure 2(b).

Generally, the peaks in Raman spectra originate from the vibration modes of the structure, which differ based on the bonding characteristics and structural differences. In order to predict Raman vibration modes C, D, and E in Figure 2(b) to obtain additional atomic structural information, phonon calculations with DFT were performed using the calculated crystal structure of SSS. The phonon dispersion of SSS was calculated from its structure in each case of 0-fold to 6-fold Sn atoms. The specific vibrational modes were determined by simulating and analyzing the vibrational direction of the atoms in each case of Sn atoms at the local minimum point in the phonon dispersion. The specific vibrational modes were matched to the vibrational modes obtained in Figure 2(b) by calculating the corresponding Raman frequency using the phonon dispersion results. As a result, vibrational mode C, D, and E in the figure were determined to be the  $E_{2g}$  bending,  $A_{1u}$  stretching, and  $A_{1u}$  stretching modes, respectively.
